1 **Title**

2 The economics of organellar gene loss and endosymbiotic gene transfer

3 **Authors**

4 Steven Kelly

5 **Affiliations**

6 1) Department of Plant Sciences, University of Oxford, South Parks Road, OX1 3RB

7 **ORCID ID**

8 SK: 0000-0001-8583-5362

9 **Corresponding author**

10 Name: Steven Kelly

11 Email: [steven.kelly@plants.ox.ac.uk](mailto:steven.kelly@plants.ox.ac.uk)

12 Telephone: +44 (0)1865 275123

13 **Keywords**

14 Endosymbiosis; gene loss endosymbiotic gene transfer; mitochondrion; chloroplast; organellar  
15 genome

16 **Abstract**

17 The endosymbiosis of the bacterial progenitors of mitochondrion and the chloroplast are landmark  
18 events in the evolution of life on earth. While both organelles have retained substantial proteomic  
19 and biochemical complexity, this complexity is not reflected in the content of their genomes. Instead,  
20 the organellar genomes encode fewer than 5% of genes found in living relatives of their ancestors.  
21 While many of the 95% of missing organellar genes have been discarded, others have been  
22 transferred to the host nuclear genome through a process known as endosymbiotic gene transfer.  
23 Here we demonstrate that the difference in the per-cell copy number of the organellar and nuclear  
24 genomes presents an energetic incentive to the cell to either delete genes or transfer them to the  
25 nuclear genome. We show that, for the majority transferred genes, the energy saved by nuclear-  
26 transfer exceeds the costs incurred from importing the encoded protein into the organelle where it  
27 can provide its function. Finally, we show that the net energy saved by endosymbiotic gene transfer  
28 can constitute an appreciable proportion of total cellular energy budgets, and is therefore sufficient  
29 to impart a selectable advantage to the cell. Thus, reduced cellular cost and improved energy

30 efficiency likely played a role in the reductive evolution of mitochondrial and chloroplast genomes  
31 and the transfer of organellar genes to the nuclear genome.

### 32 ***Significance statement***

33 The endosymbioses of the mitochondrion and the chloroplast were each followed by substantial  
34 gene loss and transfer of organellar genes to the nuclear genome. Here we show that the high per-  
35 cell copy number of these organellar genomes creates an energetic incentive for the cell to discard  
36 genes or transfer them to the nuclear genome. Thus, organellar gene loss and endosymbiotic gene  
37 transfer can be intrinsically advantageous to the cell.

### 38 ***Main text***

#### 39 ***Introduction***

40 Endosymbiosis has underpinned two of the most important innovations in the history of life on Earth  
41 (Archibald 2015a; Martin, et al. 2015). The endosymbiosis of the alphaproteobacterium that became  
42 the mitochondrion led to the emergence and radiation of the eukaryotes (Yang, et al. 1985; Martin  
43 and Müller 1998; Roger, et al. 2017), and the endosymbiosis of the cyanobacterium that became the  
44 chloroplast first enabled oxygenic photosynthesis in eukaryotes (Martin and Kowallik 1999; Archibald  
45 2015b). The function and evolution of both organelles is inextricably linked with energy metabolism  
46 and the evolution of the eukaryotic cell (Lane and Martin 2010; Lane 2014; Booth and Doolittle  
47 2015a, b; Lane and Martin 2015; Lynch and Marinov 2017; Roger, et al. 2017; Lynch and Marinov  
48 2018), and has given rise to the multicellular organisms that constitute the largest fraction of the  
49 biomass of the biosphere (Bar-On, et al. 2018).

50 Following the endosymbioses of the bacterial progenitors of mitochondrion and the chloroplast there  
51 was a dramatic reduction in the gene content of the endosymbiont genomes such that they harbour  
52 fewer than 5% of the genes found in their free-living bacterial relatives (Gray, et al. 1999; Timmis, et  
53 al. 2004; Green 2011). While many of the original endosymbiont genes have been lost (Lynch, et al.  
54 2006; McCutcheon and Moran 2012; Smith and Keeling 2015; Smith 2016), others have been  
55 transferred to the host nuclear genome and their products imported back into the organelle where  
56 they function - a process known as endosymbiotic gene transfer (Martin, et al. 2002; Brown 2003;  
57 Deusch, et al. 2008; Thiergart, et al. 2012; Dagan, et al. 2013). For example, the mitochondrion of  
58 humans (Calvo and Mootha 2010) and chloroplasts of plants (Ferro, et al. 2010) each contain more

59 than 1000 proteins yet their genomes encode fewer than 100 genes. Thus, the reduced gene content  
60 of organelles is not representative of their molecular, proteomic, or biochemical complexity.

61 The process of gene loss and endosymbiotic gene transfer is not unique to the evolution of  
62 chloroplasts and mitochondria, but has also been observed concomitant with the endosymbioses of  
63 bacteria in insects (McCutcheon and Moran 2012; Husnik, et al. 2013) and the endosymbiosis of the  
64 cyanobacterium that became the chromatophore in *Paulinella* (Nakayama and Ishida 2009; Nowack,  
65 et al. 2010; Reyes-Prieto, et al. 2010; Singer, et al. 2017; Nowack and Weber 2018). In addition, it  
66 has been suggested that lateral gene transfers from diverse bacteria into the host nuclear genome  
67 may have contributed to the process of organellar genome reduction in a manner that functionally  
68 recapitulates endosymbiotic gene transfer i.e. the endosymbiont gene becomes redundant when an  
69 orthologous or functionally equivalent gene from another species is transferred to the nuclear  
70 genome (Nowack, et al. 2016; Pittis and Gabaldon 2016). Thus, endosymbiont genome reduction in  
71 the presence of functional compensation by lateral and/or endosymbiotic gene transfer are recurring  
72 themes in the evolution of organellar and endosymbiont genomes.

73 Given, the importance of endosymbiotic gene transfer (and functionally equivalent lateral  
74 complementation) to the evolution of eukaryotic genomes, several hypotheses have been proposed  
75 to explain why it occurs (Herrmann 1997; Martin and Herrmann 1998; Daley and Whelan 2005;  
76 Reyes-Prieto, et al. 2006; Speijer, et al. 2020). For example, it has been proposed that lateral and  
77 endosymbiotic gene transfer protects endosymbiont genes (and the biological functions they  
78 provide) from mutational hazard (Allen and Raven 1996; Lynch, et al. 2006; Smith 2016; Speijer, et  
79 al. 2020), and that it enables endosymbiont genes that are otherwise trapped in a haploid genome  
80 to recombine and thus escape from Muller's ratchet (Muller 1964; Lynch 1996; Martin and Herrmann  
81 1998; Lynch, et al. 2006; Neiman and Taylor 2009; Smith 2016). It has also been proposed that  
82 endosymbiotic gene transfer is an inevitable consequence of a constant stream of endosymbiont  
83 genes entering the nucleus (Doolittle 1998), and that transfer to the nuclear genome allows the host  
84 cell to gain better control over the replication and function of the organelle (Herrmann 1997) allowing  
85 better cellular network integration (Nowack, et al. 2010; Reyes-Prieto 2015). However, mutation  
86 rates of organellar genes are often not higher than nuclear genes (Wolfe, et al. 1987; Lynch, et al.

87 2006; Lynch, et al. 2007; Drouin, et al. 2008; Smith 2015; Smith and Keeling 2015; Smith 2016;  
88 Grisdale, et al. 2019) and therefore effective mechanisms for protection against DNA damage in  
89 organelles must exist. Similarly, although there is evidence for the action of Muller's ratchet in  
90 mitochondria (Lynch 1996; Neiman and Taylor 2009) chloroplasts appear largely to escape this  
91 effect (Wolfe, et al. 1987; Lynch 1997) likely due to gene conversion (Khakhlova and Bock 2006),  
92 and thus it does not fully explain why endosymbiotic gene transfer occurred in both lineages. Finally,  
93 the nature of the regulatory advantage for having genes reside in the nuclear genome is difficult to  
94 quantify, as bacterial gene expression regulation is no-less effective than in eukaryotes and many  
95 eukaryotes utilise polycistronic regulation of gene expression (Guiliano and Blaxter 2006; Michaeli  
96 2011; Gordon, et al. 2015; Gallaher, et al. 2021). Thus, it is unclear whether endosymbiotic gene  
97 transfer functions simply as rescue from processes that would otherwise lead to gene loss, or  
98 whether there may also be an advantage to the cell for transferring an endosymbiont gene to the  
99 nuclear genome.

100 We hypothesised that an advantage for endosymbiotic gene transfer may arise from the difference  
101 in the cost to the cell of encoding a gene in the organellar and nuclear genome. This is because  
102 each eukaryotic cell typically contains multiple organelles and each organelle typically harbours  
103 multiple copies of the organellar genome (Bendich 1987; Cole 2016). The number of organelles in a  
104 cell reflects the biochemical requirement of that cell for those organelles, and the high genome copy  
105 number per organelle has been proposed to provide protection against DNA damage (Shokolenko,  
106 et al. 2009) and to enable the organelle to achieve high protein abundance for genes encoded in the  
107 organellar genome (Bendich 1987). Thus, while a diploid eukaryotic cell contains two copies of the  
108 nuclear genome, the same cell can contain hundreds to hundreds of thousands of copies of its  
109 organellar genomes (Bendich 1987; Cole 2016). For example, endosymbiotic transfer of a 1000 bp  
110 gene from the mitochondrion to the nuclear genome in humans, yeast or *Arabidopsis* would save  
111 5,000,000 bp, 200,000 bp or 100,000 bp of DNA per cell, respectively, and an analogous transfer  
112 from the chloroplast genome to the nuclear genome in *Arabidopsis* would save 1,500,000 bp of DNA  
113 per cell (see Methods for sources of genome copy numbers). As DNA costs energy and cellular  
114 resources to biosynthesise (Lynch and Marinov 2015), we hypothesised that if the energy saved by  
115 transferring a gene from the organellar genome to the nuclear genome offset the cost of importing

116 the encoded gene products (proteins) back into the organelle then this would provide a direct  
117 energetic advantage to the host cell for endosymbiotic gene transfer. Similarly, if a functionally  
118 equivalent gene from another species was laterally acquired by the nuclear genome then there would  
119 be an analogous energetic advantage to the host cell to utilise the acquired gene and delete the  
120 organellar gene.

121 Here we analyse the relative cost of DNA synthesis and protein import over a broad range of plausible  
122 parameter spaces for eukaryotic cells that encompasses total cell protein content, organellar fraction  
123 (i.e. the fraction of the total number of protein molecules in a cell that are contained within the  
124 organelle), organellar genome copy number, organellar protein abundance, organellar protein import  
125 cost, organellar protein import efficiency, and protein turnover rate. Through this we reveal that for  
126 the vast majority of plausible parameter space for eukaryotic cells it is energetically favourable to the  
127 cell to transfer organellar genes to the nuclear genome and re-import the proteins back to the  
128 organelle. We show that the interplay between per-cell organellar genome copy number and per-cell  
129 organellar protein abundance determines the magnitude of the energy saved such that it is only  
130 energy efficient for the cell to retain genes in the organellar genome if they encoding proteins with  
131 very high abundance. Through analysis of the energy saved by endosymbiotic gene transfer in the  
132 context of total cellular energy budgets, we demonstrate that the net energetic advantage of  
133 endosymbiotic gene transfer is a significant proportion of total cell energy budgets and would thus  
134 confer a selectable energetic advantage to the cell. Collectively, these results reveal that enhanced  
135 energy efficiency has helped to shape the content and evolution of eukaryotic organellar and nuclear  
136 genomes.

## 137 **Results**

### 138 ***The cost to the cell to encode a gene in the organellar genome is higher than in the*** 139 ***nuclear genome***

140 Eukaryotic cells possessing chloroplasts and/or mitochondria typically have a higher copy number  
141 of their organellar genomes than their nuclear genomes (Cole 2016). Accordingly, while a typical  
142 diploid cell will have two copies of every gene in the nuclear genome, the same cell will have  
143 hundreds to hundreds-of-thousands of copies of every organellar encoded gene (Cole 2016). This  
144 difference in per-cell genome copy number means that it costs the cell more DNA to encode a gene

145 in the organellar genome than in the nuclear genome. To provide an illustration of this difference in  
146 cost we three model eukaryotes were selected with disparate genome sizes and organellar genome  
147 content which are representative of the diverse range of values that have been previously reported  
148 (Cole 2016). Here, the cost of encoding a gene in a nuclear or organellar genome was considered  
149 to be the ATP cost of the chromosome (organellar or nuclear) divided by the number of genes on  
150 that chromosome. This consideration was performed to account for differences in organellar and  
151 nuclear genomes such as the presence of introns, structural elements (telomeres, centromeres etc),  
152 and regulatory elements. We also included the ATP cost of the requisite number of histone proteins  
153 contained in nucleosomes to compute the cost of encoding a gene in the nuclear genome. This  
154 revealed that the high per cell organellar genome copy number meant that the ATP cost of encoding  
155 a gene in the organellar genome is on average one order of magnitude higher than the cost of  
156 encoding a gene in the nuclear genome (Figure 1A). This difference in ATP cost is further enhanced  
157 if the cost of just the coding sequences (including nucleosomes but excluding introns and non-coding  
158 regions) are compared directly (Figure 1B). This latter scenario is more similar to a recent  
159 endosymbiotic gene transfer that arrives in the nuclear genome without introns and acquires these  
160 over time (Ahmadinejad, et al. 2010). As the three representative organisms shown here span the  
161 range of organellar genome copy numbers that have been observed in eukaryotes (Cole 2016), it  
162 follows that the ATP cost to the cell of encoding a gene in the organellar genome is generally higher  
163 than the cost of encoding the same gene in the nuclear genome in eukaryotes. Consequently, for  
164 any organellar gene the cell may be able to save resources by transferring that gene from the  
165 organellar genome to the nuclear genome or by acquiring a functionally equivalent gene through  
166 lateral gene transfer.

167 ***The energy saved by encoding a gene in the nuclear genome instead of the organellar***  
168 ***genome is sufficient to offset the cost of organellar protein import***

169 Although it is cheaper for the cell to encode a gene in the nuclear genome than the organellar  
170 genome, this direct cost comparison only considers the cost of DNA (and its associated proteins)  
171 and does not account for the additional cost that would be incurred should the product of a nuclear  
172 encoded gene be required to function in an organelle. Such nuclear-encoded organelle-targeted  
173 proteins incur additional energetic costs to be translocated across the organellar membranes.

174 Accordingly, to assess whether it is cheaper for the cell to encode an organelle-targeted protein in  
175 the nuclear or organellar genome it is necessary to consider both the abundance of the encoded  
176 protein and the energetic cost of organellar protein import. Estimates for the energetic cost of  
177 mitochondrial or chloroplast protein import vary over two orders of magnitude from ~0.05 ATP per  
178 amino acid to 5 ATP per amino acid (Mokranjac and Neupert 2008; Shi and Theg 2013; Backes and  
179 Herrmann 2017). Thus, for the purposes of this study the full range of estimates was considered and  
180 the range of conditions under which it is more energetically favourable to encode a gene in the  
181 organellar or nuclear genome was assessed. This analysis revealed that the higher the copy number  
182 of the organellar genome, the more energy that is saved by encoding the gene in the nuclear genome  
183 and thus the more protein that can be imported into the organelle while still reducing the overall  
184 energetic cost of the cell (Figure 2A). As the per-cell gene copy number is the same for each gene  
185 encoded on the organellar genome, the possible energetic advantage to the cell arising from  
186 endosymbiotic gene transfer will vary between genes as a function of the required abundance of  
187 each encoded gene product. Furthermore, if the cell can function without the encoded gene product,  
188 then as organellar genome copy number increases the energetic incentive to discard the gene also  
189 increases. Thus, high organellar genome copy numbers provide an energetic incentive to either  
190 delete genes from the organellar genome or transfer them to the nuclear genome.

191 Given that the magnitude of the energetic advantage of endosymbiotic gene transfer is dependent  
192 on protein abundance, we sought to simulate the endosymbiotic genome reduction that would occur  
193 using realistic models of pre-mitochondrial and pre-chloroplast organellar progenitors. Here, the  
194 complete genomes with measured protein abundances for an alphaproteobacterium (*Bartonella*  
195 *henselae*) and a cyanobacterium (*Microcystis aeruginosa*) were chosen as models for the  
196 mitochondrial and chloroplast progenitors, respectively. In addition, a range of host cell size (i.e. host  
197 cell protein content) was considered such that it encompassed the majority of diversity exhibited by  
198 extant eukaryotes (Milo 2013) and would thus likely also encompass the size range of the host cell  
199 that originally engulfed the organellar progenitors. This range extended from a small unicellular  
200 yeast-like cell ( $10^7$  proteins) to a large metazoan/plant cell ( $10^9$  proteins). Each of these cell types  
201 were then considered to allocate a realistic range of total cellular protein to mitochondria/chloroplasts  
202 representative of values observed in extant eukaryotic cells (Supplemental Table S1). For each set



203 of conditions in this comprehensive parameter space, the energy liberated or incurred by  
204 endosymbiotic gene transfer was calculated for each organellar gene given its measured protein  
205 abundance (Wang, et al. 2015) and a realistic range of protein import costs (including the total  
206 biosynthetic cost of the protein import machinery, See Methods). This revealed that for a broad range  
207 of estimates of cell size, organellar genome copy number, and organellar fraction (i.e. the fraction of  
208 the total number of protein molecules in a cell that are contained within the organelle) it is  
209 energetically favourable to the cell to transfer the majority of organellar genes to the nuclear genome  
210 and re-import the proteins back to the organelle (Figure 2B and 2C). Only the proteins with the  
211 highest abundance, and thus which incur the largest import cost, are energetically favourable to be  
212 retained in the organellar genomes. This phenomenon was also observed even if extreme costs for  
213 protein import ten times those that have been measured are considered (Supplemental Figure S1).  
214 Thus, it is more energy efficient for a eukaryotic cell to position the majority of genes that encode  
215 organellar targeted proteins in the nuclear genome.

216 The above analysis assumed that the total pool of cellular protein was replaced with each cell  
217 doubling. This assumption is consistent with observations that protein turn-over in eukaryotes (as in  
218 bacteria) is primarily mediated by dilution due to cell division (Boisvert, et al. 2012; Gawron, et al.  
219 2016; Martin-Perez and Villén 2017), i.e. the vast majority of proteins have half-lives that are longer  
220 in duration than the doubling time of the cell, and thus protein turn-over occurs through replicative  
221 dilution. However, a small population of proteins are turned-over more than once per cell division  
222 cycle (Boisvert, et al. 2012; Gawron, et al. 2016; Martin-Perez and Villén 2017), and in multicellular  
223 organisms there can be populations of cells with low or negligible rate of cell division resulting in a  
224 higher rate of protein turn-over per cell division. Thus, to determine the impact of enhanced rates of  
225 protein turn-over relative to cell doubling the analysis above was repeated while increasing the rate  
226 of protein turn-over from once per cell division cycle (i.e. dividing cells) to 50 times per cell division  
227 cycle (i.e. a long-lived or non-dividing cell). Increasing the rate of protein turn-over increases the total  
228 amount of protein that must be imported into the organelle (akin to an increase in absolute  
229 abundance of that protein) and thus leads to an increase in the number of proteins for which it is  
230 energetically favourable to retain their corresponding genes in the organellar genomes (Figure 3A  
231 and B). However, even if it is assumed that the total pool of each organellar protein is turned over



232 50 times per cell division cycle, it is still more energetically favourable to transfer the majority of  
233 organellar genes to the nuclear genome when organellar genome copy number is high (Figure 3A  
234 and B). Thus, in both dividing cells and in cells with higher rates of protein turn-over relative to cell  
235 division it is more energetically favourable to encode the majority of organellar targeted proteins in  
236 the nuclear genome.

237 ***Protein abundance can explain a significant proportion of variance in loss, retention***  
238 ***and, transfer of organellar genes***

239 The analyses above predict that the proteins with the highest abundance, and thus those which incur  
240 the higher import cost, are those that are more likely to be retained in an organellar genome. While  
241 it is unknown how the abundance of proteins in organelles has changed throughout the evolution of  
242 the eukaryotes, it is possible to estimate what the profile of protein abundances may have looked  
243 like during the initial stages of this process by examining protein abundance in extant bacterial  
244 relatives of organelles (Wang, et al. 2015). Using these estimates it is thus possible to ask whether  
245 those genes that are retained in the organellar genome are those that encode proteins with higher  
246 abundance than those that are lost or transferred to the nuclear genome. This revealed that the  
247 abundance of the cohorts of proteins whose genes are retained in the chloroplast (Figure 4A) and  
248 mitochondrial (Figure 4B) genomes of *Arabidopsis thaliana*, and the mitochondrial genome of  
249 *Saccharomyces cerevisiae* (Figure 4C) are significantly higher than the abundance of the cohorts of  
250 proteins that were either lost or transferred to the respective nuclear genomes. The abundance of  
251 the cohort of proteins whose genes are retained in the mitochondrial genome of *Homo sapiens* were  
252 not significantly different to those that have been lost or transferred to the nuclear genome (Figure  
253 4D). To assess whether or not this elevated protein abundance was a general phenomenon, the full  
254 set of complete plastid and mitochondrial genomes were downloaded from NCBI and the sets of  
255 genes present or absent from these genomes were analysed. Here, the corresponding nuclear  
256 genomes were not available so it was not possible to separately assess the abundance proteins  
257 encoded by lost or putatively transferred genes, and thus they were analysed together. This analysis  
258 revealed that the abundance of proteins encoded by genes found in extant plastid (Figure 4E) or  
259 mitochondrial (Figure 4F) genomes in eukaryotes was significantly higher than those that have been  
260 lost or transferred to the nuclear genome. Thus, across all eukaryotes the abundance of proteins

261 encoded by genes retained in organellar genomes is higher than the abundance of proteins encoded  
262 by genes that were either lost or transferred to the nuclear genome.

263 ***The energy saved by gene loss or endosymbiotic gene transfer is sufficient to***  
264 ***produce a selectable advantage for the majority of genes***

265 Although gene loss or endosymbiotic gene transfer can save energy, the question arises as to  
266 whether this energy saving would be sufficient to confer a selectable advantage for the cell. To  
267 estimate this, the energy liberated by endosymbiotic gene transfer of each gene encoded in the  
268 ancestral pre-organellar genomes was evaluated as a proportion of the total energy required to  
269 replicate the cell. As above, this analysis was conducted for a broad range of host cell size, organellar  
270 fraction, endosymbiont/organellar genome copy number, and protein import cost that is  
271 representative of a broad range of eukaryotic cells (Figure 5A and B, Supplemental Figures S2 – S7,  
272 Supplemental Table S2). This revealed that for even modest per-cell endosymbiont genome copy  
273 numbers (~100 copies per cell), the proportion of the total cell energy budget that could be saved for  
274 an individual gene transfer event (or equivalent functional lateral complementation) is sufficient that  
275 it would confer a selectable advantage. If the energetic advantage is considered to be a direct fitness  
276 advantage then the selection coefficients for the transfer of the majority of individual endosymbiont  
277 genes are  $\sim 1 \times 10^{-5}$  (Figure 5, Supplemental Figures S2 – S7). This  $\sim 1,000$  times stronger than the  
278 selection coefficient acting against disfavoured synonymous codons (Hartl, et al. 1994). Moreover,  
279 for high per-cell endosymbiont genome copy numbers (~1000 genome copies per cell) these  
280 selection coefficients are proportionally larger ( $\sim 1 \times 10^{-4}$ ), equivalent to approximately 1/10<sup>th</sup> the  
281 strength of selection that caused the allele conferring lactose tolerance to rapidly sweep through  
282 human populations in ~500 generations (Bersaglieri, et al. 2004). In contrast, selection coefficients  
283 for retention of genes in the organellar genome generally only occur when organellar genome copy  
284 numbers are low, and/or when large proportions of cellular resources are invested in organelle  
285 (Figure 5A and B, Supplemental Figures S2 – S7). Thus, over a broad range of host cell sizes,  
286 organellar genome copy numbers, organellar fractions, and per-protein ATP import costs,  
287 endosymbiotic gene transfer of the majority of genes is sufficiently energetically advantageous that  
288 any such transfer events, if they occurred, would confer an energetic advantage to the cell and have

289 the potential to rapidly reach fixation (Supplemental Figure S8). Thus, endosymbiotic gene transfer  
290 of the majority of organellar genes is advantageous to eukaryotic cells.

## 291 **Discussion**

292 The endosymbiosis of the bacterial progenitors of the mitochondrion and the chloroplast are  
293 landmark events in the evolution eukaryotes. Following these endosymbioses there was a dramatic  
294 reduction in the gene content of the organellar genomes such that they now harbour fewer than 5%  
295 of the genes found in their free-living bacterial relatives. Some of these genes have been discarded,  
296 but many have been transferred to the nuclear genome and their products (proteins) are imported  
297 back into the organelle where they function. The reason why these organelles have transferred their  
298 genes to the nucleus is a long-standing unanswered question in evolutionary biology. Here, we show,  
299 through extensive simulation of plausible parameter spaces for eukaryotic cells, that there are energy  
300 incentives for gene loss and for endosymbiotic gene transfer from organellar genomes. We show  
301 that these energy incentives are dependent on the abundance of the encoded gene product, with a  
302 trade-off between per-cell organellar genome copy number and protein abundance determining  
303 magnitude and direction of the energy incentive. We further show that these energy incentives can  
304 be sufficient to produce a selectable advantage to the host cell for both endosymbiotic gene transfer  
305 and for retention of genes in the organellar genomes. Thus, the economics of protein production and  
306 transport plays a role in determining whether genes are lost, retained or transferred from organellar  
307 genomes.

308 Although this study reveals that the energy efficiency of protein production can provide driver for the  
309 location of an organellar gene, it is not proposed that it is the only factor that influences this process.  
310 Instead, a large cohort of factors including the requirement for organellar mediated RNA editing,  
311 protein chaperones, protein folding, post-translational modifications, escaping mutation hazard,  
312 Muller's ratchet, enhanced nuclear control, the requirement for redox regulation of gene expression,  
313 and drift will act antagonistically or synergistically with energetic incentives described here to  
314 influence the set of genes that are retained in, lost, or transferred from, the organellar genomes. The  
315 study presented here simply reveals that energy efficiency is a previously overlooked factor that has  
316 likely played a role in shaping the evolution organellar/nuclear genomes. Moreover, the change in

317 cost to the cell provides a simple mechanistic basis for selection to act with or against Doolittle's  
318 "You are what you eat" ratchet for endosymbiotic gene transfer (Doolittle 1998).

319 It is noteworthy in these contexts, that if the protein encoded by the endosymbiont gene can provide  
320 its function outside of the endosymbiont (e.g. by catalysing a reaction that could occur equally well  
321 in the cytosol of the host as in the endosymbiont) then the energetic advantage of gene transfer to  
322 the nuclear genome is further enhanced, as the cost of protein import is not incurred. Similarly,  
323 although gene loss has been proposed to be mediated predominantly by mutation pressure and drift  
324 (Lynch, et al. 2006), the elevated per-cell endosymbiont genome copy number also provides a  
325 substantial energetic reward to the host cell for complete gene loss as neither the costs of encoding  
326 the gene or producing its product are incurred. Thus, high organellar genome copy number provides  
327 an energetic incentive for the cell to delete endosymbiont genes or transfer them to the nuclear  
328 genome.

329 While the analysis presented here focussed on the energetic cost measured in ATP so that the cost  
330 of protein import and the cost of biosynthesis of DNA could be evaluated on a common basis,  
331 endosymbiotic gene transfer also results in changes in the elemental requirements of a cell.  
332 Specifically, as the monophosphate nucleotides that constitute DNA are composed of carbon (A =  
333 10, C = 9, G = 10, T = 10), nitrogen (A = 5, C = 3, G = 5, T = 2), and phosphorous (A = 1, C = 1, G  
334 = 1, T = 1) atoms, endosymbiotic gene transfer can also result in substantial savings of these  
335 resources (Supplemental Figure S9). Thus, if organisms encounter carbon, nitrogen or phosphorous  
336 limitation in their diet and environment then the advantage of endosymbiotic gene transfer to the cell  
337 will be further enhanced.

338 The analysis presented here shows that for a broad range of cell sizes and resource allocations that  
339 endosymbiotic gene transfer of the majority of organellar genes is energetically favourable and thus  
340 advantageous to the cell. However, it also showed that retention of genes in the organellar genomes  
341 is energetically favourable under conditions where the encoded organellar protein is required in very  
342 high abundance and/or the copy number of the organellar genome is low. Other interlinked  
343 competing factors that influence the energetically optimal location of a gene are shown in Figure 6.  
344 Each of these factors interact to influence the cost to the cell for encoding a gene in the nuclear or

345 organellar genome. This is important, as while we do not know precisely what the cells that engulfed  
346 the progenitors of the mitochondrion or the chloroplast looked like (as only extant derivatives  
347 survive), it is safe to assume that cell size and investment in organelles has altered since these  
348 primary endosymbioses first occurred. Accordingly, the selective advantage (or disadvantage) of  
349 transfer of any given gene is transient and will have varied during the radiation of the eukaryotes as  
350 factors such as cell size and organellar volume evolved and changed in disparate eukaryotic  
351 lineages. This coupled with the lack of an organellar protein export system (i.e. from the organelle to  
352 the host cytosol) and the presence (and acquisition) of introns in nuclear encoded genes (Rogozin,  
353 et al. 2012) means that it is more difficult for endosymbiotic gene transfer to operate in the reverse  
354 direction (i.e. from the nucleus to organelle). Similarly, eukaryotic cells can typically tolerate the loss  
355 of one or more chloroplasts (Zhuang and Jiang 2019) or mitochondria (Ding and Yin 2012) from a  
356 cell without the concomitant death of the cell, the disruption of these organelles is thought to be a  
357 major route through which DNA from organelles enters the nucleus and can thus be incorporated  
358 into the nuclear genome. The converse process (i.e. the loss of the nucleus) is terminal to the cell  
359 and is thought to be a major reason why endosymbiotic gene transfer operates in one direction only.  
360 Collectively, these factors would create a ratchet-like effect trapping genes in the nuclear genome  
361 even if subsequent changes in cell size and organellar fraction means that it became energetically  
362 advantageous to return the gene to the organelle later in evolution. Thus, current organellar and  
363 nuclear gene contents predominantly reflect past pressures to delete organellar genes or transfer  
364 them to the nuclear genome.

365 Endosymbiotic gene loss and gene transfer is a recurring theme in the evolution of the eukaryotic  
366 tree of life. The discovery that endosymbiotic gene transfer (or equivalent functional lateral  
367 complementation) can provide an energetic advantage to the cell for loss, retention or transfer of  
368 organellar genes to the nuclear genome uncovers a novel process that has helped shape the content  
369 and evolution of eukaryotic genomes.

## 370 ***Materials and Methods***

### 371 ***Data sources***

372 The *Arabidopsis thaliana* genome sequence and corresponding set of representative gene models  
373 were downloaded from Phytozome V13 (Goodstein, et al. 2012). The human genome sequence and

374 gene models from assembly version GRCh38.p13 (GCA\_000001405.28), the *Bartonella henselae*  
375 genome sequence and gene models from assembly version ASM4670v1, the *Microcystis*  
376 *aeruginosa* NIES-843 genome sequence and gene models from assembly version ASM1062v1 were  
377 each downloaded from Ensembl (Yates, et al. 2020). The *Saccharomyces cerevisiae* sequence and  
378 gene models from assembly version R64-2-1\_20150113 were downloaded from the *Saccharomyces*  
379 Genome Database (Cherry, et al. 2012). Protein abundance data for all species were obtained from  
380 PAXdb v4.1 (Wang, et al. 2015).

381 ***Constants used to evaluate the per cell ATP costs of genes and chromosomes***

382 The ATP biosynthesis cost of nucleotides and amino acids was obtained from (Chen, et al. 2016)  
383 and (Lynch and Marinov 2015) and are provided in Supplemental Table S3. The *Homo sapiens*  
384 mitochondrial genome copy number of 5000 was obtained from (Cole 2016). The *Saccharomyces*  
385 *cerevisiae* mitochondrial genome copy number of 200 was obtained from (Miyakawa 2017). The  
386 *Arabidopsis thaliana* chloroplast genome copy number of 1500 was obtained from (Zoschke, et al.  
387 2007) and the *Arabidopsis thaliana* mitochondrial genome copy number of 100 was obtained from  
388 (Cole 2016).

389 For genes in nuclear chromosomes the cost of DNA was calculated to include the cost of  
390 nucleosomes with one histone octamer comprising two copies each of the histone proteins H2A,  
391 H2B, H3, and H4 every 180bp (147bp for the two turns of DNA around the histone octamer and 33bp  
392 for the spacer) (Lynch and Marinov 2015). For organellar chromosomes there are no  
393 histones/nucleosomes and thus the biosynthetic cost of genes in organellar chromosomes was  
394 calculated as cost of the DNA divided by the number of genes on the chromosome (Supplemental  
395 Table S4). Although there are no histone protein equivalents in that organellar genomes, it should  
396 be noted that there are some nuclear encoded proteins that are known to bind mitochondrial or  
397 chloroplast DNA. The costs associated with these proteins have not been included here as their  
398 function in packaging DNA is unknown and their density within the organellar genome is also  
399 unknown and it is thus difficult to estimate their required abundance. However, inclusion of the  
400 production and import costs of these proteins would further increase the cost of encoding a gene in  
401 the organellar genome and would accentuate the differences shown in this study.



402 The average gene length used for the simulation study in Figure 2 was obtained by computing the  
403 average gene length across the two bacterial genomes used in this study, *Bartonella henselae*  
404 ASM4670v1 and *Microcystis aeruginosa* NIES-843.

#### 405 **Calculating protein import costs**

406 Although the molecular mechanisms of mitochondrial and chloroplast protein import differ (Soll and  
407 Schleiff 2004; Jarvis 2008; Wiedemann and Pfanner 2017) they share many commonalities including  
408 the requirement for energy in the form of nucleoside triphosphate hydrolysis (Schatz and  
409 Dobberstein 1996). The energetic cost of mitochondrial or chloroplast protein import is difficult to  
410 measure directly, and accordingly estimates vary over two orders of magnitude from ~0.05 ATP per  
411 amino acid to 5 ATP per amino acid (Mokranjac and Neupert 2008; Shi and Theg 2013; Backes and  
412 Herrmann 2017). Thus, for the purposes of this study the full range of estimates was considered in  
413 all simulations when evaluating the import cost of organellar targeted proteins encoded by nuclear  
414 genes.

415 The cost of the biosynthesis of the protein import machinery (i.e. the TOC/TIC or TOM/TIM  
416 complexes, Supplemental Table S5) was also included in the per protein import costs calculated in  
417 this study. For *Arabidopsis thaliana*, if the total ATP biosynthesis cost of all TOC/TIC complex  
418 proteins in the cell (i.e. the full biosynthesis cost of all the amino acids of all the proteins at their  
419 measured abundance in the cell) is distributed equally among all of the proteins that are imported  
420 into the chloroplast then it would add an additional 0.2 ATP per residue imported (Supplemental  
421 Table S6). Similarly, if the total ATP biosynthesis cost of all TOM/TIM proteins in the cell in *Homo*  
422 *sapiens*, *Saccharomyces cerevisiae* and *Arabidopsis thaliana* is distributed equally among all of the  
423 proteins that are imported into the mitochondrion in those species then it would add an additional  
424 0.2 ATP, 0.7 ATP, and 0.2 ATP per residue imported, respectively (Supplemental Table S6). In all  
425 cases the proteins that were predicted to be imported into the organelle were identified using  
426 TargetP-2.0 (Almagro Armenteros, et al. 2019) and protein abundance was calculated using  
427 measured protein abundance estimates for each species obtained from PAXdb 4.0 (Wang, et al.  
428 2015), assuming a total cell protein content of  $1 \times 10^9$  proteins for a human cell,  $1 \times 10^7$  proteins for a  
429 yeast cell and  $2.5 \times 10^{10}$  proteins for an *Arabidopsis thaliana* cell. As we modelled ATP import costs



430 from 0.05 ATP to 50 ATP per-residue the cost of the import machinery was considered to be included  
431 within the bounds considered in this analysis.

### 432 **Evaluating the proportion of the total proteome invested in organelles**

433 To provide estimates of the fraction of cellular protein resources invested in organellar proteomes  
434 the complete predicted proteomes and corresponding protein abundances were quantified.  
435 Organellar targeting was predicted using TargetP-2.0 (Almagro Armenteros, et al. 2019) and protein  
436 abundance estimates obtained from PAXdb 4.0 (Wang, et al. 2015). The proportion of cellular  
437 resources are provided in Supplemental Table S1 and were used to provide the indicative regions  
438 or parameter space occupied by metazoa, yeast and plants shown on Figure 2B and C. Specifically,  
439 ~5% of total cellular protein is contained within mitochondria in *H. sapiens*, *S. cerevisiae* and *A.*  
440 *thaliana* and ~50% of total cellular protein is contained within chloroplasts in *A. thaliana*.

### 441 **Calculating the free energy of endosymbiotic gene transfer**

442 The free energy of endosymbiotic gene transfer ( $\Delta E_{EGT}$ ) is here defined as the difference in energy  
443 cost to the cell to encode a given gene in the organellar genome and the cost to encode the same  
444 gene in the nuclear genome and import the requisite amount of gene product into to the organelle.  
445  $\Delta E_{EGT}$  is evaluated as the difference in ATP biosynthesis cost required to encode a gene ( $\Delta D$ ) in the  
446 endosymbiont genome ( $D_{end}$ ) and the nuclear genome ( $D_{nuc}$ ) minus the difference in ATP  
447 biosynthesis cost required to produce the protein ( $\Delta P$ ) in the organelle ( $P_{end}$ ) vs in the cytosol ( $P_{cyt}$ )  
448 and ATP cost to import the protein into the organelle ( $P_{import}$ ). Such that

$$449 \quad \Delta E_{EGT} = \Delta D - \Delta P \quad [1]$$

450 Where

$$451 \quad \Delta D = D_{end} - D_{nuc} \quad [2]$$

452 And

$$453 \quad \Delta P = P_{end} - P_{cyt} - P_{import} \quad [3]$$

454 Thus,  $\Delta E_{EGT}$  can be positive or negative depending on the cost associated with each parameter. The  
455 energetic cost of producing a protein in the endosymbiont and in the cytosol are assumed to be equal  
456 and thus

457 
$$\Delta P = P_{import} [4]$$

458 It should be noted here that although the  $P_{end}$  and  $P_{cyt}$  are assumed to be equal for the majority of  
459 calculations an analysis was conducted wherein an inefficient protein import system was assumed  
460 such that 50% of protein failed to be imported and thus must be turned over (Supplemental Figure  
461 S2). Even under these conditions it is still energetically favourable to encode organellar genes in the  
462 nuclear genome for realistic estimates of cell sizes and investment in organelles.

463  $P_{import}$  is evaluated as the product of the product of the length of the amino acid sequence ( $L_{prot}$ ), the  
464 ATP cost of importing a single residue from the contiguous polypeptide chain of that protein ( $C_{import}$ ),  
465 the number of copies of that protein contained within the cell that must be imported ( $N_p$ ) such that

466 
$$\Delta P = P_{import} = L_{prot} C_{import} N_p [5]$$

467 Measured estimates of  $C_{import}$  range from ~0.05 ATP per amino acid to 5 ATP per amino acid  
468 (Mokranjac and Neupert 2008; Shi and Theg 2013; Backes and Herrmann 2017). For the purposes  
469 of this study we used these measured ranges and also modelled a  $C_{import}$  up to 10 times higher than  
470 any measured estimate i.e. from 0.05 ATP to 50 ATP.

471 Both  $D_{end}$  and  $D_{nuc}$  are evaluated as the product of the ATP biosynthesis cost of the double stranded  
472 DNA ( $A_{DNA}$ ) that comprises the gene under consideration and the copy number ( $C$ ) of the genome in  
473 the cell such that

474 
$$D_{end} = A_{DNA} C_{end} [6]$$

475 And

476 
$$D_{nuc} = A_{DNA} C_{nuc} [7]$$

477 Such that

478 
$$\Delta D = A_{DNA} (C_{end} - C_{nuc}) [8]$$

479 Where  $C_{end}$  and  $C_{nuc}$  are the per-cell copy number of the endosymbiont and nuclear genomes  
480 respectively and the ATP biosynthesis cost for the complete biosynthesis of an A:T base pair and a  
481 G:C base pair are 40.55 ATP and 40.14 ATP respectively (Chen, et al. 2016). Thus

482 
$$\Delta E_{EGT} = A_{DNA} (C_{end} - C_{nuc}) - L_{prot} C_{import} N_p [9]$$

483 Where positive values of  $\Delta E_{EGT}$  correspond to genes for which it is more energetically favourable to  
484 be encoded in the nuclear genome, and negative values correspond to genes for which it is more  
485 energetically favourable to be encoded in the endosymbiont genome.

### 486 ***Simulating endosymbiotic gene transfer of mitochondrial and chloroplast genes***

487 The complete genomes with measured protein abundances for an alphaproteobacterium (*Bartonella*  
488 *henselae*) and a cyanobacterium (*Microcystis aeruginosa*) were selected to serve as models for an  
489 ancestral mitochondrion and cyanobacterium, respectively. To account for uncertainty in the size  
490 and complexity of the ancestral pre-mitochondrial and pre-chloroplast host cells, a range of potential  
491 ancestral cells was considered to be engulfed by a range of different host cells with protein contents  
492 representative of the diversity of extant eukaryotic cells (Milo 2013). Specifically, the size of the host  
493 cell ranged from a small unicellular yeast-like cell ( $10^7$  proteins), to a medium sized unicellular algal-  
494 like cell ( $10^8$  proteins) to a typical metazoan/plant cell ( $10^9$  proteins). Each of these host cell types  
495 was then considered to allocate a realistic range of total cellular protein to mitochondria/chloroplasts  
496 typical of eukaryotic cells (i.e. ~2% for yeast (Uchida, et al. 2011), ~20% for metazoan cells (David  
497 1977) and ~50% of the non-vacuolar volume of plant cells (Winter, et al. 1994)). It is not important  
498 whether the organellar fraction of the cell is composed of a single large organelle or multiple smaller  
499 organelles as all costs, abundances, and copy numbers are evaluated at a per-cell level. For each  
500 simulated cell,  $\Delta E_{EGT}$  was evaluated for each gene in the endosymbiont genome using real protein  
501 abundance data (Wang, et al. 2015) for a realistic range of endosymbiont genome copy numbers  
502 using equation 9. In all cases the host cell was assumed to be diploid. The simulations were repeated  
503 for three different per-residue protein import costs (0.05 ATP, 2 ATP, and 5 ATP per residue  
504 respectively). The number of genes where  $\Delta E_{EGT}$  was positive was recorded as these genes  
505 comprise the cohort that are energetically favourable to be encoded in the nuclear genome. All  
506 calculated values for  $\Delta E_{EGT}$  for both the model organisms are provided in Supplemental Table S2.

### 507 ***Estimating the strength of selection acting on endosymbiotic gene transfer***

508 To model the proportion of energy that would be saved by an individual endosymbiotic gene transfer  
509 event a number of assumptions were made. It was assumed that the ancestral host cell had a cell  
510 size that is within the range of extant eukaryotes (i.e. between  $1 \times 10^7$  proteins per cell and  $1 \times 10^9$   
511 proteins per cell). It was assumed that the endosymbiont occupied a fraction of the total cell proteome

512 that is within the range exhibited by most eukaryotes today (2% to 50% of total cellular protein is  
513 located within the endosymbiont under consideration). It was assumed that endosymbiont genome  
514 copy number ranged between 1 copy per cell (as it most likely started out with a single copy) and  
515 10,000 copies per cell.

516 We assumed an ancestral host cell with a 24-hour doubling time such that all genomes and proteins  
517 are produced in the required abundance every 24-hour period. As previously defined (Lynch and  
518 Marinov 2015), the energy required for cell growth was modelled as

$$519 \quad C_r = 26.92V^{0.97} [10]$$

520 In addition, all cells, irrespective of whether they are bacterial or eukaryotic, consume ATP ( $C_m$ ) in  
521 proportion to their cell volume ( $V$ ) at approximately the rate of

$$522 \quad C_m = 0.39V^{0.88} [11]$$

523 where  $C_m$  is in units of  $10^9$  molecules of ATP cell<sup>-1</sup> hour<sup>-1</sup>, and  $V$  is in units of  $\mu\text{m}^3$  (Lynch and Marinov  
524 2015). Thus, the total energy ( $E_R$ ) needed to replicate a cell was considered to be

$$525 \quad E_R = C_r + 24 C_m [12]$$

526 The proportional energetic advantage or disadvantage ( $E_{A/D}$ ) to the host cell from the endosymbiotic  
527 gene transfer of a given gene is evaluated as the free energy of endosymbiotic gene transfer divided  
528 by the total amount of energy consumed by the cell during its 24-hour life cycle.

$$529 \quad E_{A/D} = \frac{\Delta E_{EGT}}{E_R} [13]$$

530 Given that  $E_{A/D}$  describes the proportional energetic advantage or disadvantage a cell has from a  
531 given endosymbiotic gene transfer event  $E_{A/D}$  can be used directly as selection coefficient ( $s$ ) to  
532 evaluate the strength of selection acting on the endosymbiotic gene transfer of a given gene. Such  
533 that

$$534 \quad s = E_{A/D} [14]$$

535 As  $\Delta E_{EGT}$  can be positive or negative as described above,  $s$  is therefore also positive or negative  
536 depending on endosymbiont genome copy number, endosymbiont fraction, host cell protein content,  
537 the abundance of the protein that must be imported and the ATP cost of protein import. When  $s$  is

538 less than zero the absolute value of  $s$  is taken to be the selection coefficient for retention of a gene  
539 in the endosymbiont genome ( $S_R$ ), when  $s$  is greater than 0 the value of  $s$  is taken to be the selection  
540 coefficient for endosymbiotic gene transfer to the nucleus ( $S_{EGT}$ ). All calculated values for  $s$  for both  
541 the model alphaproteobacterium (*Bartonella henselae*) and cyanobacterium (*Microcystis*  
542 *aeruginosa*) are provided in Supplemental Table S1.

543 It should be noted here that variation in the doubling time will have a direct effect on the estimate of  
544 the selection coefficients. Decreasing cell doubling time 10-fold increases the values of  $s$  by a factor  
545 of 10 and *vice versa*, such that cells with shorter doubling times would experience stronger selection  
546 on the free energy of endosymbiotic gene transfer and cells with longer doubling times would  
547 experience weaker selection.

548 Similarly, the effect of protein turnover was not included as estimates for protein turn over were not  
549 available for each protein considered in these analyses. However, the effect of protein turnover is to  
550 increase the total amount of protein that must be produced within the life cycle of the cell. Thus, for  
551 the purposes of this analysis can be considered equivalent to increasing the cellular investment in  
552 organelles.

### 553 ***Estimating time to fixation***

554 Fixation times for endosymbiotic gene transfer events for a range of observed selection coefficients  
555 from  $1 \times 10^{-5}$  to  $1 \times 10^{-2}$  were estimated using a Wright–Fisher model with selection and drift (Fisher  
556 1930; Wright 1931) implemented in a simple evolutionary dynamics simulation (Niklaus and Kelly  
557 2018). The effective population size for these simulations was set as  $1 \times 10^7$ , as is representative of  
558 unicellular eukaryotes (Lynch and Conery 2003) and multicellularity in eukaryotes is not thought to  
559 have evolved until after the endosymbiosis of either the mitochondrion or the chloroplast.

### 560 ***Acknowledgements and funding sources***

561 This work was funded by the Royal Society and the European Union’s Horizon 2020 research and  
562 innovation program under grant agreement number 637765. SK would like to thank Thomas A.  
563 Richards, David M. Emms, and John M. Archibald for their comments on the manuscript.

### 564 ***Data availability***

565 All of the data required to conduct this analysis was obtained from public repositories as outlined in  
566 the materials and methods.

567 **Figures**

568 **Figure 1**

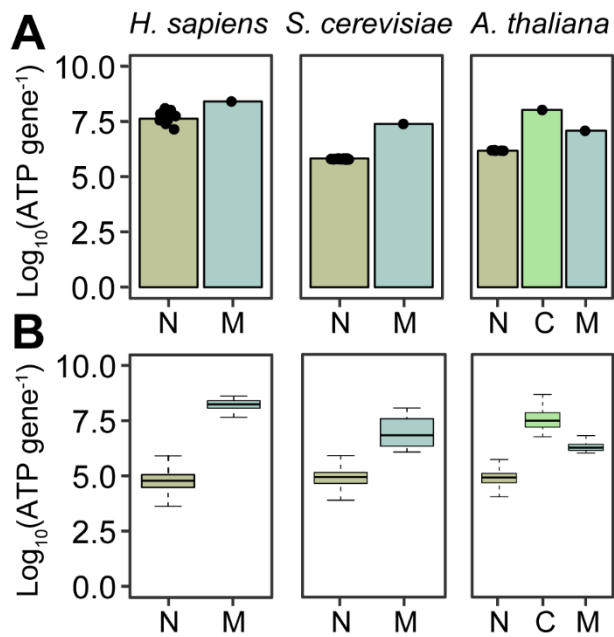

569

570 **Figure 1.** The per-cell biosynthetic cost of nuclear and organellar genes in three representative  
571 eukaryotes. **A)** The ATP biosynthesis costs of nuclear (N), chloroplast (C), and mitochondrial (M)  
572 genes calculated as the cost of the chromosome divided by the number of genes contained within  
573 that chromosome. Nuclear chromosomes include the cost of nucleosomes, organellar chromosomes  
574 only included the cost of the DNA. In the case of the nuclear genes the height of bar depicts the  
575 mean cost of all nuclear chromosomes with individual points showing all chromosomes overlaid on  
576 top the bar plots. **B)** The ATP biosynthesis cost of just the coding sequences of the genes. In both  
577 A and B, the costs were computed assuming a diploid nuclear genome, a per-cell mitochondrial  
578 genome copy number of 5000, 200 and 100 for the in *H. sapiens*, *S. cerevisiae* and *A. thaliana*,  
579 respectively, and a per cell chloroplast genome copy number of 1500 in *A. thaliana*.

580 **Figure 2**

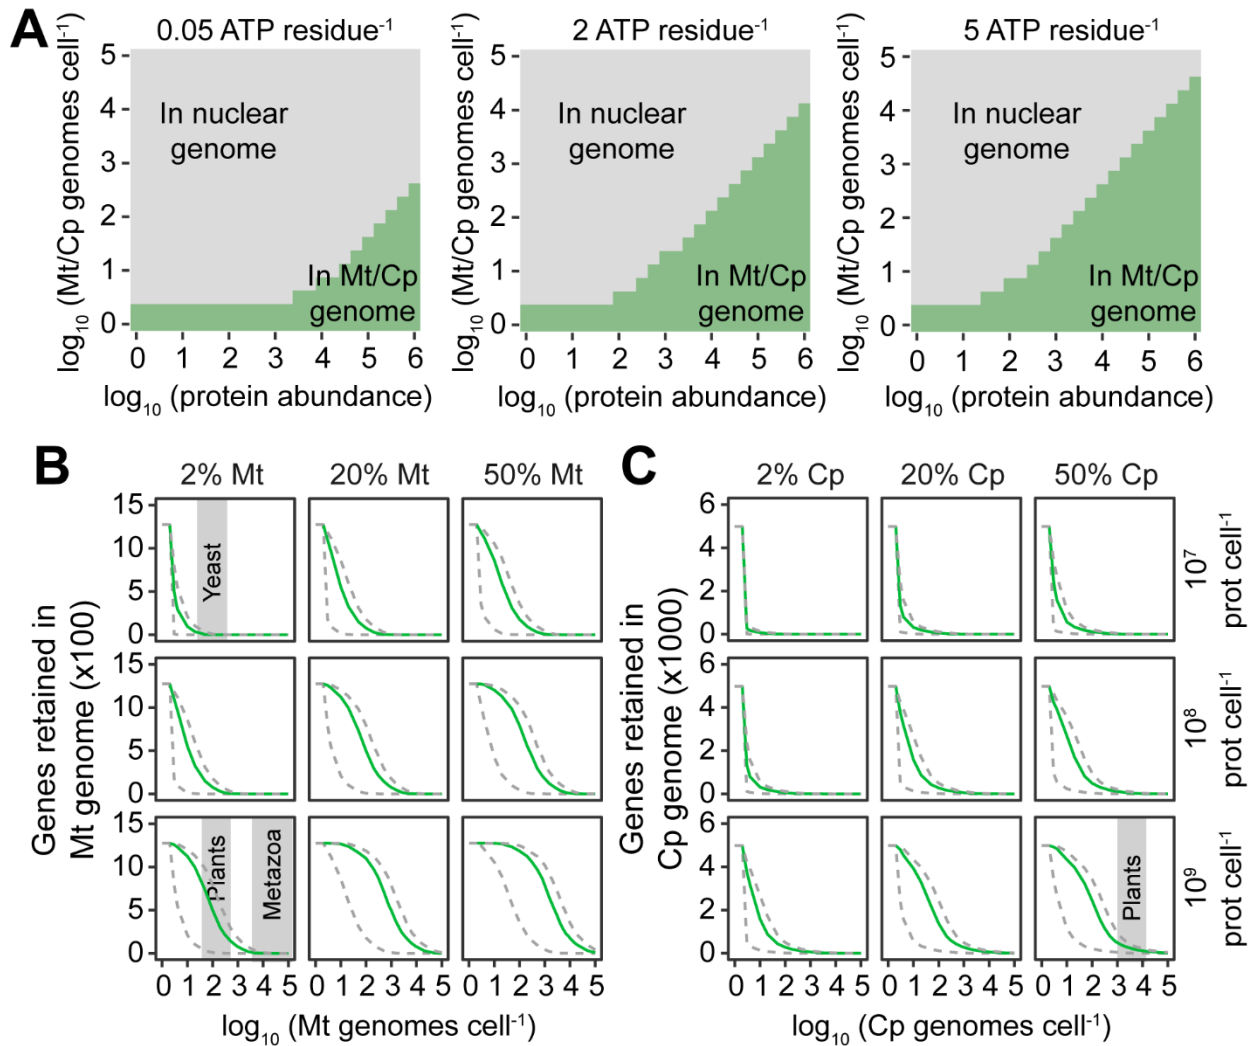

581

582 **Figure 2.** The minimum cost location to the cell of organellar genes encoding an organellar localised  
 583 protein. **A)** The minimum cost location of an organellar gene for a range of per-protein import costs,  
 584 organellar genome copy numbers, and encoded protein abundance. The modelled per-residue  
 585 protein import cost is shown above each plot. The grey shaded fractions of the plots indicate the  
 586 regions of parameter space where it is more energetically favourable to the cell to encode an  
 587 organellar gene in the nuclear genome and import the requisite amount of protein. The green shaded  
 588 fractions of the plots indicate the regions of parameter space where it is more energetically  
 589 favourable to the cell to encode the gene in the organellar genome. **B)** The number of genes in the  
 590 alphaproteobacterial (mitochondrial) genome for which it is more energetically favourable to the cell  
 591 for the gene to be retained in the organellar genome. Green lines assume a per-residue protein  
 592 import cost of 2 ATP per amino acid. Grey dashed lines indicate lower and upper cost bounds of  
 593 0.05 ATP and 5 ATP per residue respectively. **C)** As in B but for the cyanobacterial (chloroplast)



594 genome. Grey shaded areas on plots are provided to indicate the organellar genome copy numbers  
595 of yeast, metazoan and plant cells. Cp: chloroplast. Mt: mitochondrion.

596 **Figure 3**

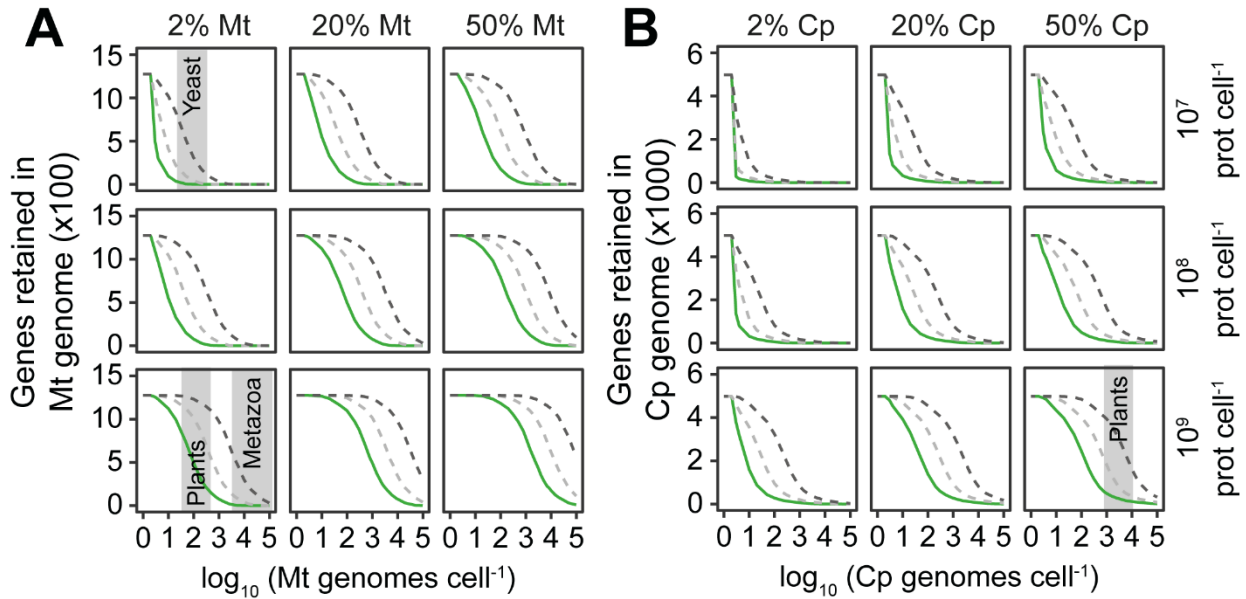

597

598 **Figure 3.** The impact of protein turnover on the energetic favourability or organellar gene retention.

599 **A)** The number of genes in the alphaproteobacterial (mitochondrial) genome for which it is more  
600 energetically favourable to the cell for the gene to be retained in the organellar genome. **C)** As in B  
601 but for the cyanobacterial (chloroplast) genome. All lines assume a per-residue protein import cost  
602 of 2 ATP per amino acid. Green lines assume that protein turnover is mediated by dilution due to cell  
603 division. Light grey dashed lines assume that the complete pool of organellar proteins at the requisite  
604 abundance are replaced 5 times per cell doubling. Dark grey dashed lines assume that the complete  
605 pool of organellar proteins at the requisite abundance are replaced 50 times per cell doubling. Grey  
606 shaded areas on plots are provided for illustrative purposes to indicate the organellar genome copy  
607 numbers of yeast, metazoan and plant cells. Cp: chloroplast. Mt: mitochondrion.

608

609 **Figure 4**

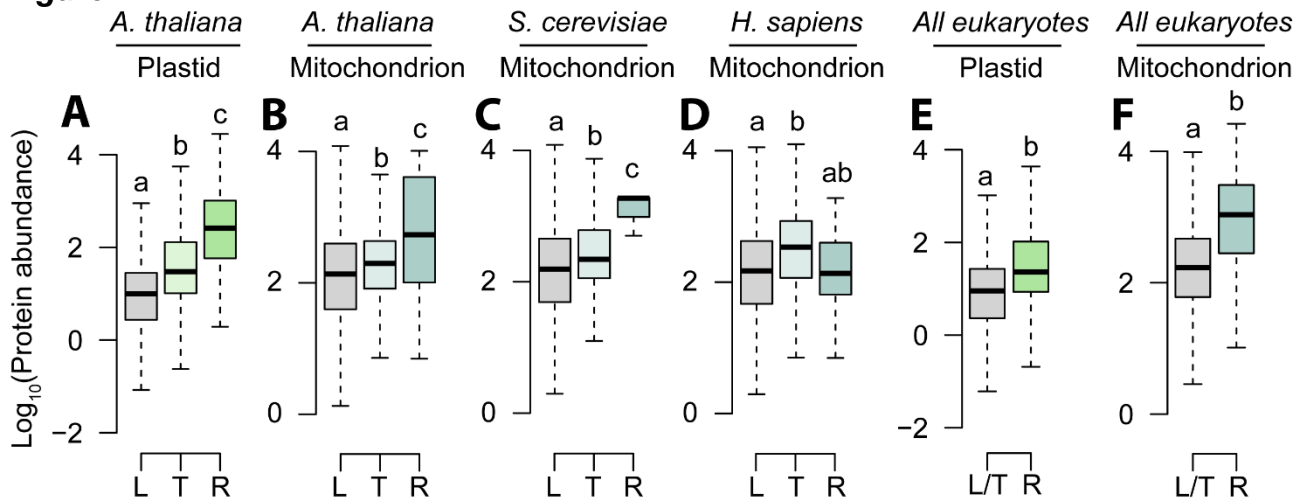

610  
611 **Figure 4.** The abundance of proteins encoded by genes that have been lost, transferred to the  
612 nucleus or retained in the organellar genome. **A)** The abundance of proteins in the cyanobacterium  
613 *Microcystis aeruginosa* categorised according to whether their encoding genes have been lost,  
614 transferred to the *Arabidopsis thaliana* nuclear genome, or retained in the *Arabidopsis thaliana*  
615 chloroplast genome. **B)** The abundance of proteins in the alphaproteobacterium *Bartonella henselae*  
616 categorised according to whether their encoding genes have been lost, transferred to the  
617 *Arabidopsis thaliana* nuclear genome, or retained in the *Arabidopsis thaliana* mitochondrial genome.  
618 **C and D,** as in B but for *Saccharomyces cerevisiae* and *Homo sapiens*, respectively. **E)** as in A, but  
619 for all plastid genomes on NCBI. **F)** as in B, but for all mitochondrial genomes on NCBI. L: lost. T:  
620 Transferred to nuclear genome. R: Retained in organellar genome. Letters above boxplots indicate  
621 whether there were significant differences between the means of different groups ( $p < 0.05$ ) in the  
622 results of a one-way ANOVA with Tukey test for multiple comparisons.

623 **Figure 5**

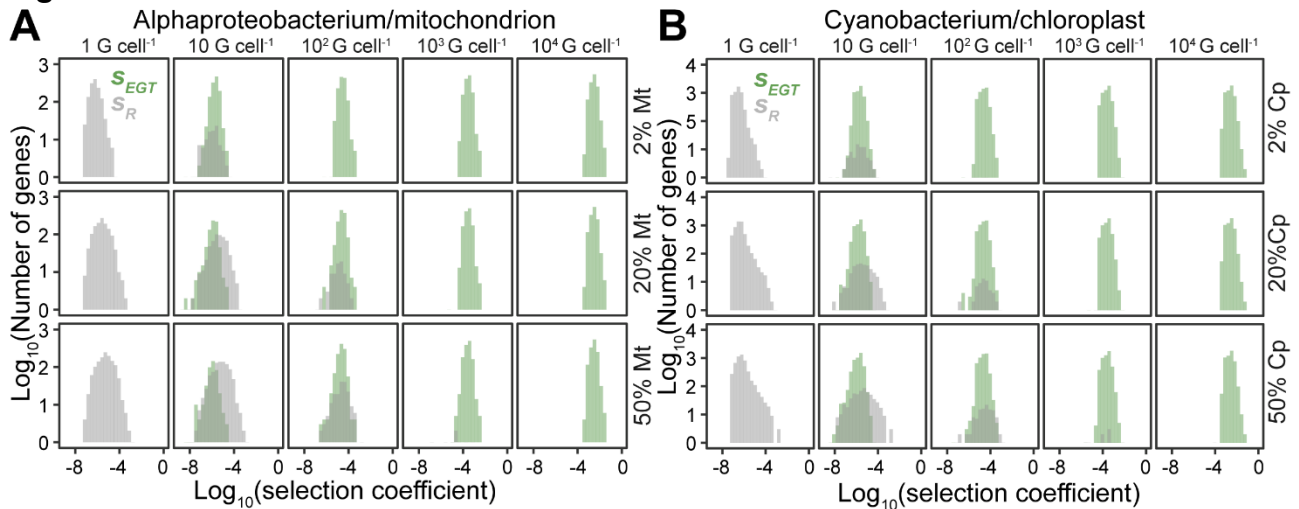

624

625 **Figure 5.** Selection coefficients for retention ( $S_R$ , grey) or endosymbiotic gene transfer ( $S_{EGT}$ , green)

626 of all genes encoded in the example alphaproteobacterial and cyanobacterial genomes. Coefficients

627 were computed accounting for protein abundance, host cell organellar fraction, organellar genome

628 copy number per cell, and host cell energy consumption. Plots shown are for a simulated host cell

629 comprising  $1 \times 10^7$  proteins and a protein import cost of 2 ATP per residue, plots for other host cell

630 protein contents and protein import costs are provided in Supplemental Figures S4-S9. **A)** Selection

631 coefficients of all genes encoded in the alphaproteobacterium genome. **B)** Selection coefficients for

632 all genes encoded in the cyanobacterial genome.  $S_R$  and  $S_{EGT}$  have opposite signs (see methods).

633 To simplify the display and enable direct comparison, the absolute value of the selection coefficients

634 of each gene are plotted and green shading is used to indicate genes in the  $S_{EGT}$  fraction and grey

635 shading indicates genes in the  $S_R$  fraction of the genome. Mt, mitochondrion. Cp, chloroplast. G,

636 genomes.

637 **Figure 6**

| Gene in nuclear genome                 | ↔ | Gene in organellar genome |
|----------------------------------------|---|---------------------------|
| High                                   |   | Low                       |
| Organellar genome copy number per cell |   |                           |
| High                                   |   | Low                       |
| Cell division rate                     |   |                           |
| Low                                    |   | High                      |
| Protein abundance in organelle         |   |                           |
| Low                                    |   | High                      |
| Protein turnover                       |   |                           |
| Low                                    |   | High                      |
| Cell size (total protein content)      |   |                           |
| Low                                    |   | High                      |
| Organelle fraction                     |   |                           |
| Low                                    |   | High                      |
| ATP import cost per amino acid         |   |                           |

638 **Figure 6.** The competing factors that influence the energetically optimal location of a gene encoding  
639 an organellar targeted protein. Many of these factors are linked (e.g. protein abundance in organelle  
640 and organellar fraction, or cell division rate and protein turn-over) and are provided here for  
641 completion.  
642

643 **References**

- 644 Ahmadinejad N, Dagan T, Gruenheit N, Martin W, Gabaldón T. 2010. Evolution  
645 of spliceosomal introns following endosymbiotic gene transfer. *BMC Evol Biol*  
646 10:57.
- 647 Allen JF, Raven JA. 1996. Free-radical-induced mutation vs redox regulation:  
648 costs and benefits of genes in organelles. *J Mol Evol* 42:482-492.
- 649 Almagro Armenteros JJ, Salvatore M, Emanuelsson O, Winther O, von Heijne  
650 G, Elofsson A, Nielsen H. 2019. Detecting sequence signals in targeting  
651 peptides using deep learning. *Life Sci Alliance* 2.
- 652 Archibald John M. 2015a. Endosymbiosis and Eukaryotic Cell Evolution.  
653 *Current Biology* 25:R911-R921.
- 654 Archibald JM. 2015b. Genomic perspectives on the birth and spread of  
655 plastids. *Proceedings of the National Academy of Sciences* 112:10147-10153.
- 656 Backes S, Herrmann JM. 2017. Protein Translocation into the Intermembrane  
657 Space and Matrix of Mitochondria: Mechanisms and Driving Forces. *Frontiers*  
658 *in Molecular Biosciences* 4.
- 659 Bar-On YM, Phillips R, Milo R. 2018. The biomass distribution on Earth.  
660 *Proceedings of the National Academy of Sciences* 115:6506-6511.
- 661 Bendich AJ. 1987. Why do chloroplasts and mitochondria contain so many  
662 copies of their genome? *Bioessays* 6:279-282.
- 663 Bersaglieri T, Sabeti PC, Patterson N, Vanderploeg T, Schaffner SF, Drake JA,  
664 Rhodes M, Reich DE, Hirschhorn JN. 2004. Genetic signatures of strong recent  
665 positive selection at the lactase gene. *Am J Hum Genet* 74:1111-1120.
- 666 Boisvert FM, Ahmad Y, Gierliński M, Charrière F, Lamont D, Scott M, Barton  
667 G, Lamond AI. 2012. A quantitative spatial proteomics analysis of proteome  
668 turnover in human cells. *Mol Cell Proteomics* 11:M111.011429.
- 669 Booth A, Doolittle WF. 2015a. Eukaryogenesis, how special really?  
670 *Proceedings of the National Academy of Sciences* 112:10278-10285.
- 671 Booth A, Doolittle WF. 2015b. Reply to Lane and Martin: Being and becoming  
672 eukaryotes. *Proceedings of the National Academy of Sciences* 112:E4824-  
673 E4824.
- 674 Brown JR. 2003. Ancient horizontal gene transfer. *Nature Reviews Genetics*  
675 4:121-132.
- 676 Calvo SE, Mootha VK. 2010. The mitochondrial proteome and human disease.  
677 *Annu Rev Genomics Hum Genet* 11:25-44.
- 678 Chen W-H, Lu G, Bork P, Hu S, Lercher MJ. 2016. Energy efficiency trade-offs  
679 drive nucleotide usage in transcribed regions. *Nature Communications*  
680 7:11334.
- 681 Cherry JM, Hong EL, Amundsen C, Balakrishnan R, Binkley G, Chan ET,  
682 Christie KR, Costanzo MC, Dwight SS, Engel SR, et al. 2012. *Saccharomyces*  
683 *Genome Database: the genomics resource of budding yeast*. *Nucleic Acids*  
684 *Res* 40:D700-705.
- 685 Cole LW. 2016. The Evolution of Per-cell Organelle Number. *Front Cell Dev*  
686 *Biol* 4:85.

- 687 Dagan T, Roettger M, Stucken K, Landan G, Koch R, Major P, Gould SB,  
688 Goremykin VV, Rippka R, Tandeau de Marsac N, et al. 2013. Genomes of  
689 Stigonematalean cyanobacteria (subsection V) and the evolution of oxygenic  
690 photosynthesis from prokaryotes to plastids. *Genome Biol Evol* 5:31-44.
- 691 Daley DO, Whelan J. 2005. Why genes persist in organelle genomes. *Genome*  
692 *Biology* 6:110.
- 693 David H. 1977. *Quantitative Ultrastructural Data of Animal and Human Cells:*  
694 *Gustav Fischer.*
- 695 Deusch O, Landan G, Roettger M, Gruenheit N, Kowallik KV, Allen JF, Martin  
696 W, Dagan T. 2008. Genes of Cyanobacterial Origin in Plant Nuclear Genomes  
697 Point to a Heterocyst-Forming Plastid Ancestor. *Molecular Biology and*  
698 *Evolution* 25:748-761.
- 699 Ding WX, Yin XM. 2012. Mitophagy: mechanisms, pathophysiological roles,  
700 and analysis. *Biol Chem* 393:547-564.
- 701 Doolittle WF. 1998. You are what you eat: a gene transfer ratchet could account  
702 for bacterial genes in eukaryotic nuclear genomes. *Trends Genet* 14:307-311.
- 703 Drouin G, Daoud H, Xia J. 2008. Relative rates of synonymous substitutions in  
704 the mitochondrial, chloroplast and nuclear genomes of seed plants. *Mol*  
705 *Phylogenet Evol* 49:827-831.
- 706 Ferro M, Brugière S, Salvi D, Seigneurin-Berny D, Court M, Moyet L, Ramus  
707 C, Miras S, Mellal M, Le Gall S, et al. 2010. AT\_CHLORO, a comprehensive  
708 chloroplast proteome database with subplastidial localization and curated  
709 information on envelope proteins. *Mol Cell Proteomics* 9:1063-1084.
- 710 Fisher RAS. 1930. *The genetical theory of natural selection.* Oxford: Clarendon  
711 Press.
- 712 Gallaher SD, Craig RJ, Ganesan I, Purvine SO, McCorkle SR, Grimwood J,  
713 Strenkert D, Davidi L, Roth MS, Jeffers TL, et al. 2021. Widespread  
714 polycistronic gene expression in green algae. *Proceedings of the National*  
715 *Academy of Sciences* 118:e2017714118.
- 716 Gawron D, Ndah E, Gevaert K, Van Damme P. 2016. Positional proteomics  
717 reveals differences in N-terminal proteoform stability. *Mol Syst Biol* 12:858.
- 718 Goodstein DM, Shu S, Howson R, Neupane R, Hayes RD, Fazo J, Mitros T,  
719 Dirks W, Hellsten U, Putnam N, et al. 2012. Phytozome: a comparative platform  
720 for green plant genomics. *Nucleic Acids Res* 40:D1178-1186.
- 721 Gordon SP, Tseng E, Salamov A, Zhang J, Meng X, Zhao Z, Kang D,  
722 Underwood J, Grigoriev IV, Figueroa M, et al. 2015. Widespread Polycistronic  
723 Transcripts in Fungi Revealed by Single-Molecule mRNA Sequencing. *PLoS*  
724 *One* 10:e0132628.
- 725 Gray MW, Burger G, Lang BF. 1999. Mitochondrial evolution. *Science*  
726 283:1476-1481.
- 727 Green BR. 2011. Chloroplast genomes of photosynthetic eukaryotes. *Plant J*  
728 66:34-44.
- 729 Grisdale CJ, Smith DR, Archibald JM. 2019. Relative Mutation Rates in  
730 Nucleomorph-Bearing Algae. *Genome Biology and Evolution* 11:1045-1053.



- 731 Guiliano DB, Blaxter ML. 2006. Operon conservation and the evolution of trans-  
732 splicing in the phylum Nematoda. *PLoS Genet* 2:e198.
- 733 Hartl DL, Moriyama EN, Sawyer SA. 1994. Selection intensity for codon bias.  
734 *Genetics* 138:227-234.
- 735 Herrmann R. 1997. Eukaryotism, towards a new interpretation. In. *Eukaryotism*  
736 *and symbiosis: Springer.* p. 73-118.
- 737 Husnik F, Nikoh N, Koga R, Ross L, Duncan RP, Fujie M, Tanaka M, Satoh N,  
738 Bachtrog D, Wilson AC, et al. 2013. Horizontal gene transfer from diverse  
739 bacteria to an insect genome enables a tripartite nested mealybug symbiosis.  
740 *Cell* 153:1567-1578.
- 741 Jarvis P. 2008. Targeting of nucleus-encoded proteins to chloroplasts in plants.  
742 *New Phytologist* 179:257-285.
- 743 Khakhlova O, Bock R. 2006. Elimination of deleterious mutations in plastid  
744 genomes by gene conversion. *The Plant Journal* 46:85-94.
- 745 Lane N. 2014. Bioenergetic constraints on the evolution of complex life. *Cold*  
746 *Spring Harb Perspect Biol* 6:a015982.
- 747 Lane N, Martin W. 2010. The energetics of genome complexity. *Nature*  
748 467:929-934.
- 749 Lane N, Martin WF. 2015. Eukaryotes really are special, and mitochondria are  
750 why. *Proceedings of the National Academy of Sciences* 112:E4823-E4823.
- 751 Lynch M. 1997. Mutation accumulation in nuclear, organelle, and prokaryotic  
752 transfer RNA genes. *Mol Biol Evol* 14:914-925.
- 753 Lynch M. 1996. Mutation accumulation in transfer RNAs: molecular evidence  
754 for Muller's ratchet in mitochondrial genomes. *Mol Biol Evol* 13:209-220.
- 755 Lynch M, Conery JS. 2003. The origins of genome complexity. *Science*  
756 302:1401-1404.
- 757 Lynch M, Koskella B, Schaack S. 2006. Mutation Pressure and the Evolution  
758 of Organelle Genomic Architecture. *Science* 311:1727-1730.
- 759 Lynch M, Lynch PSTSM, Walsh B. 2007. *The Origins of Genome Architecture:*  
760 *Oxford University Press, Incorporated.*
- 761 Lynch M, Marinov GK. 2015. The bioenergetic costs of a gene. *Proceedings of*  
762 *the National Academy of Sciences* 112:15690-15695.
- 763 Lynch M, Marinov GK. 2017. Membranes, energetics, and evolution across the  
764 prokaryote-eukaryote divide. *eLife* 6:e20437.
- 765 Lynch M, Marinov GK. 2018. Response to Martin and colleagues: mitochondria  
766 do not boost the bioenergetic capacity of eukaryotic cells. *Biology Direct* 13:26.
- 767 Martin-Perez M, Villén J. 2017. Determinants and Regulation of Protein  
768 Turnover in Yeast. *Cell Syst* 5:283-294.e285.
- 769 Martin W, Herrmann RG. 1998. Gene Transfer from Organelles to the Nucleus:  
770 *How Much, What Happens, and Why?* *Plant Physiology* 118:9-17.
- 771 Martin W, Kowallik K. 1999. Annotated English translation of Mereschkowsky's  
772 1905 paper 'Über Natur und Ursprung der Chromatophoren im Pflanzenreiche'.  
773 *European Journal of Phycology* 34:287-295.
- 774 Martin W, Müller M. 1998. The hydrogen hypothesis for the first eukaryote.  
775 *Nature* 392:37-41.

- 776 Martin W, Rujan T, Richly E, Hansen A, Cornelsen S, Lins T, Leister D, Stoebe  
777 B, Hasegawa M, Penny D. 2002. Evolutionary analysis of  
778 *Arabidopsis*, cyanobacterial, and chloroplast genomes reveals  
779 plastid phylogeny and thousands of cyanobacterial genes in the nucleus.  
780 *Proceedings of the National Academy of Sciences* 99:12246-12251.
- 781 Martin WF, Garg S, Zimorski V. 2015. Endosymbiotic theories for eukaryote  
782 origin. *Philos Trans R Soc Lond B Biol Sci* 370:20140330.
- 783 McCutcheon JP, Moran NA. 2012. Extreme genome reduction in symbiotic  
784 bacteria. *Nature Reviews Microbiology* 10:13-26.
- 785 Michaeli S. 2011. Trans-splicing in trypanosomes: machinery and its impact on  
786 the parasite transcriptome. *Future Microbiol* 6:459-474.
- 787 Milo R. 2013. What is the total number of protein molecules per cell volume? A  
788 call to rethink some published values. *Bioessays* 35:1050-1055.
- 789 Miyakawa I. 2017. Organization and dynamics of yeast mitochondrial  
790 nucleoids. *Proc Jpn Acad Ser B Phys Biol Sci* 93:339-359.
- 791 Mokranjac D, Neupert W. 2008. Energetics of protein translocation into  
792 mitochondria. *Biochimica et Biophysica Acta (BBA) - Bioenergetics* 1777:758-  
793 762.
- 794 Muller HJ. 1964. The relation of recombination to mutational advance. *Mutation*  
795 *Research/Fundamental and Molecular Mechanisms of Mutagenesis* 1:2-9.
- 796 Nakayama T, Ishida K. 2009. Another acquisition of a primary photosynthetic  
797 organelle is underway in *Paulinella chromatophora*. *Curr Biol* 19:R284-285.
- 798 Neiman M, Taylor DR. 2009. The causes of mutation accumulation in  
799 mitochondrial genomes. *Proceedings of the Royal Society B: Biological*  
800 *Sciences* 276:1201-1209.
- 801 Niklaus M, Kelly S. 2018. The molecular evolution of C4 photosynthesis:  
802 opportunities for understanding and improving the world's most productive  
803 plants. *Journal of Experimental Botany* 70:795-804.
- 804 Nowack EC, Price DC, Bhattacharya D, Singer A, Melkonian M, Grossman AR.  
805 2016. Gene transfers from diverse bacteria compensate for reductive genome  
806 evolution in the chromatophore of *Paulinella chromatophora*. *Proc Natl Acad*  
807 *Sci U S A* 113:12214-12219.
- 808 Nowack ECM, Vogel H, Groth M, Grossman AR, Melkonian M, Glöckner G.  
809 2010. Endosymbiotic Gene Transfer and Transcriptional Regulation of  
810 Transferred Genes in *Paulinella chromatophora*. *Molecular Biology and*  
811 *Evolution* 28:407-422.
- 812 Nowack ECM, Weber APM. 2018. Genomics-Informed Insights into  
813 Endosymbiotic Organelle Evolution in Photosynthetic Eukaryotes. *Annual*  
814 *Review of Plant Biology* 69:51-84.
- 815 Pittis AA, Gabaldon T. 2016. Late acquisition of mitochondria by a host with  
816 chimaeric prokaryotic ancestry. *Nature* 531:101-104.
- 817 Reyes-Prieto A. 2015. The basic genetic toolkit to move in with your  
818 photosynthetic partner. *Frontiers in Ecology and Evolution* 3.

- 819 Reyes-Prieto A, Hackett JD, Soares MB, Bonaldo MF, Bhattacharya D. 2006.  
820 Cyanobacterial Contribution to Algal Nuclear Genomes Is Primarily Limited to  
821 Plastid Functions. *Current Biology* 16:2320-2325.
- 822 Reyes-Prieto A, Yoon HS, Moustafa A, Yang EC, Andersen RA, Boo SM,  
823 Nakayama T, Ishida K, Bhattacharya D. 2010. Differential gene retention in  
824 plastids of common recent origin. *Mol Biol Evol* 27:1530-1537.
- 825 Roger AJ, Muñoz-Gómez SA, Kamikawa R. 2017. The Origin and  
826 Diversification of Mitochondria. *Curr Biol* 27:R1177-r1192.
- 827 Rogozin IB, Carmel L, Csuros M, Koonin EV. 2012. Origin and evolution of  
828 spliceosomal introns. *Biol Direct* 7:11.
- 829 Schatz G, Dobberstein B. 1996. Common Principles of Protein Translocation  
830 Across Membranes. *Science* 271:1519-1526.
- 831 Shi L-X, Theg SM. 2013. Energetic cost of protein import across the envelope  
832 membranes of chloroplasts. *Proceedings of the National Academy of Sciences*  
833 110:930-935.
- 834 Shokolenko I, Venediktova N, Bochkareva A, Wilson GL, Alexeyev MF. 2009.  
835 Oxidative stress induces degradation of mitochondrial DNA. *Nucleic Acids Res*  
836 37:2539-2548.
- 837 Singer A, Poschmann G, Mühlich C, Valadez-Cano C, Hänsch S, Hüren V,  
838 Rensing SA, Stühler K, Nowack ECM. 2017. Massive Protein Import into the  
839 Early-Evolutionary-Stage Photosynthetic Organelle of the Amoeba *Paulinella*  
840 chromatophora. *Curr Biol* 27:2763-2773.e2765.
- 841 Smith DR. 2015. Mutation rates in plastid genomes: they are lower than you  
842 might think. *Genome Biol Evol* 7:1227-1234.
- 843 Smith DR. 2016. The mutational hazard hypothesis of organelle genome  
844 evolution: 10 years on. *Molecular Ecology* 25:3769-3775.
- 845 Smith DR, Keeling PJ. 2015. Mitochondrial and plastid genome architecture:  
846 Reoccurring themes, but significant differences at the extremes. *Proceedings*  
847 *of the National Academy of Sciences* 112:10177-10184.
- 848 Soll J, Schleiff E. 2004. Protein import into chloroplasts. *Nat Rev Mol Cell Biol*  
849 5:198-208.
- 850 Speijer D, Hammond M, Lukeš J. 2020. Comparing Early Eukaryotic  
851 Integration of Mitochondria and Chloroplasts in the Light of Internal ROS  
852 Challenges: Timing is of the Essence. *mBio* 11:e00955-00920.
- 853 Thiergart T, Landan G, Schenk M, Dagan T, Martin WF. 2012. An evolutionary  
854 network of genes present in the eukaryote common ancestor polls genomes  
855 on eukaryotic and mitochondrial origin. *Genome Biol Evol* 4:466-485.
- 856 Timmis JN, Ayliffe MA, Huang CY, Martin W. 2004. Endosymbiotic gene  
857 transfer: organelle genomes forge eukaryotic chromosomes. *Nat Rev Genet*  
858 5:123-135.
- 859 Uchida M, Sun Y, McDermott G, Knoechel C, Le Gros MA, Parkinson D, Drubin  
860 DG, Larabell CA. 2011. Quantitative analysis of yeast internal architecture  
861 using soft X-ray tomography. *Yeast* 28:227-236.

- 862 Wang M, Herrmann CJ, Simonovic M, Szklarczyk D, von Mering C. 2015.  
863 Version 4.0 of PaxDb: Protein abundance data, integrated across model  
864 organisms, tissues, and cell-lines. *Proteomics* 15:3163-3168.
- 865 Wiedemann N, Pfanner N. 2017. Mitochondrial Machineries for Protein Import  
866 and Assembly. *Annual Review of Biochemistry* 86:685-714.
- 867 Winter H, Robinson DG, Heldt HW. 1994. Subcellular volumes and metabolite  
868 concentrations in spinach leaves. *Planta* 193:530-535.
- 869 Wolfe KH, Li WH, Sharp PM. 1987. Rates of nucleotide substitution vary greatly  
870 among plant mitochondrial, chloroplast, and nuclear DNAs. *Proceedings of the*  
871 *National Academy of Sciences* 84:9054-9058.
- 872 Wright S. 1931. Evolution in Mendelian Populations. *Genetics* 16:97-159.
- 873 Yang D, Oyaizu Y, Oyaizu H, Olsen GJ, Woese CR. 1985. Mitochondrial  
874 origins. *Proceedings of the National Academy of Sciences* 82:4443-4447.
- 875 Yates AD, Achuthan P, Akanni W, Allen J, Allen J, Alvarez-Jarreta J, Amode  
876 MR, Armean IM, Azov AG, Bennett R, et al. 2020. Ensembl 2020. *Nucleic Acids*  
877 *Res* 48:D682-d688.
- 878 Zhuang X, Jiang L. 2019. Chloroplast Degradation: Multiple Routes Into the  
879 Vacuole. *Frontiers in Plant Science* 10.
- 880 Zoschke R, Liere K, Börner T. 2007. From seedling to mature plant:  
881 *Arabidopsis* plastidial genome copy number, RNA accumulation and  
882 transcription are differentially regulated during leaf development. *The Plant*  
883 *Journal* 50:710-722.
- 884
